# Supplementary material
Source: HighWire-hosted journal article supplement (https://thorax.bmj.com/content/thoraxjnl-2019-213757)
Supplement: inline-supplementary-material-1 [file inline-supplementary-material-1.pdf]

**Supplementary Table 1. Perinatal data contrasted between those with expiratory airflow data and those without expiratory airflow data at 25 years among EP/ELBW participants and controls**

| Variable                          | EP/ELBW      |               |                             | Controls     |               |                              |
|-----------------------------------|--------------|---------------|-----------------------------|--------------|---------------|------------------------------|
|                                   | Data n=164   | No data n=133 | Comparison                  | Data n=130   | No data n=130 | Comparison                   |
| Antenatal corticosteroids         | 77% (126)    | 68% (90)      | 1.58* (0.95, 2.65)<br>0.08  | 1% (1/128)   | 2% (2/129)    | 0.50* (0.04, 5.58)<br>0.57   |
| Birthweight - g                   | 881 (156)    | 898 (166)     | -17† (-54, 20) 0.36         | 3368 (466)   | 3405 (409)    | -37† (-144, 70) 0.50         |
| Gestational age – completed weeks | 26.6 (2.0)   | 26.9 (1.9)    | -0.3† (-0.8, 0.1) 0.14      | 39.2 (1.5)   | 39.2 (1.4)    | -0.1† (-0.4, 0.3) 0.66       |
| Birthweight z-score               | -0.70 (1.16) | -0.76 (1.23)  | 0.06† (-0.22, 0.33)<br>0.67 | -0.03 (0.92) | -0.01 (0.85)  | -0.03† (-0.24, 0.19)<br>0.81 |
| Male                              | 46% (75)     | 47% (62)      | 0.97* (0.61, 1.53)<br>0.88  | 44% (57)     | 53% (69)      | 0.69* (0.42, 1.12)<br>0.14   |
| Multiple birth                    | 32% (53)     | 28% (37)      | 1.24* (0.75, 2.04)<br>0.40  | 3% (4)       | 3% (4)        | 1.00* (0.24, 4.09)<br>1.0    |
| Exogenous surfactant              | 38% (63)     | 42% (56)      | 0.86* (0.54, 1.37)<br>0.52  | 0            | 0             |                              |
| Postnatal corticosteroids         | 35% (57)     | 30% (40)      | 1.24* (0.76, 2.02)<br>0.40  | 0            | 0             |                              |

---

|                             |          |          |                    |   |   |
|-----------------------------|----------|----------|--------------------|---|---|
| Bronchopulmonary dysplasia‡ | 40% (65) | 42% (56) | 0.90* (0.57, 1.44) | 0 | 0 |
|                             |          |          | 0.67               |   |   |

---

Data are mean (SD), or % (n), unless otherwise stated.

\*Odds ratio or †mean difference (95% confidence interval) P-value; ‡Oxygen dependency at 36 weeks.
