# Supplementary material
Source: HighWire-hosted journal article supplement (https://thorax.bmj.com/content/thoraxjnl-2019-213757)
Supplement: inline-supplementary-material-2 [file inline-supplementary-material-2.pdf]

**Supplementary Table 2. Expiratory airflows at 25 years of age contrasted a) between EP and control groups, and b) between ELBW and control groups**

| <b>Flow variable</b>        | <b>EP n=128</b>  | <b>Control n=130</b> | <b>Mean difference (95% CI)<br/>P-value*</b> | <b>ELBW n=136</b> | <b>Control n=130</b> | <b>Mean difference (95% CI)<br/>P-value*</b> |
|-----------------------------|------------------|----------------------|----------------------------------------------|-------------------|----------------------|----------------------------------------------|
| <b>FEV<sub>1</sub></b>      |                  |                      |                                              |                   |                      |                                              |
| z-score                     | -1.03 (1.26)     | 0.03 (1.01)          | -1.06 (-1.34, -0.78) <0.001                  | -0.98 (1.24)      | 0.03 (1.01)          | -1.01 (-1.29, -0.74) <0.001                  |
| % predicted                 | 87.6 (15.2)      | 100.3 (11.9)         | -12.7 (-16.0, -9.3) <0.001                   | 88.2 (15.0)       | 100.3 (11.9)         | -12.1 (-15.4, -8.8) <0.001                   |
| percentile                  | 26.6 (26.3)      | 49.8 (27.6)          | -23.1 (-29.7, -16.5) <0.001                  | 27.3 (27.0)       | 49.8 (27.6)          | -22.5 (-29.1, -15.9) <0.001                  |
| <b>FVC</b>                  |                  |                      |                                              |                   |                      |                                              |
| z-score                     | -0.10 (1.11)     | 0.24 (0.93)          | -0.34 (-0.59, -0.09) 0.008                   | -0.15 (1.04)      | 0.24 (0.93)          | -0.39 (-0.63, 0.15) 0.002                    |
| % predicted                 | 98.9 (13.3)      | 103.0 (11.4)         | -4.1 (-7.1, -1.0) 0.009                      | 98.3 (12.4)       | 103.0 (11.4)         | -4.6 (-7.5, 1.8) 0.002                       |
| percentile                  | 47.6 (29.4)      | 56.4 (26.5)          | -8.8 (-15.6, -1.9) 0.012                     | 46.3 (28.0)       | 56.4 (26.5)          | -10.1 (-16.6, 3.5) 0.003                     |
| <b>FEV<sub>1</sub>/FVC</b>  |                  |                      |                                              |                   |                      |                                              |
| z-score                     | -1.32 (1.24)     | -0.31 (1.02)         | -0.96 (-1.23, -0.69) <0.001                  | -0.31 (1.02)      | -0.31 (1.02)         | -0.93 (-1.19, -0.66) <0.001                  |
| % predicted                 | 88.2 (11.3)      | 97.1 (8.3)           | -8.8 (-11.2, -6.4) <0.001                    | 89.2 (10.4)       | 97.1 (8.3)           | -7.9 (-10.2, -5.6) <0.001                    |
| percentile                  | 20.2 (25.0)      | 41.1 (27.3)          | -20.9 (-27.3, -14.5) <0.001                  | 21.1 (25.3)       | 41.1 (27.3)          | -19.9 (-26.3, -13.6) <0.001                  |
| ratio                       | 0.757<br>(0.099) | 0.829 (0.073)        | -0.072 (-0.094, -0.051)<br><0.001            | 0.765<br>(0.092)  | 0.829 (0.073)        | -0.064 (-0.084, -0.043)<br><0.001            |
| <b>FEF<sub>25-75%</sub></b> |                  |                      |                                              |                   |                      |                                              |
| z-score                     | -1.53 (1.30)     | -0.27 (1.02)         | -1.26 (-1.54, -0.97) <0.001†                 | -1.46 (1.25)      | -0.27 (1.02)         | -1.19 (-1.47, -0.91) <0.001                  |

---

|             |             |             |                             |             |             |                             |
|-------------|-------------|-------------|-----------------------------|-------------|-------------|-----------------------------|
| % predicted | 69.1 (25.3) | 94.8 (22.8) | -25.7 (-31.6, -19.8) <0.001 | 70.3 (24.8) | 94.8 (22.8) | -24.5 (-30.3, -18.8) <0.001 |
| percentile  | 17.7 (22.7) | 42.2 (27.7) | -24.4 (-30.6, -18.2) <0.001 | 18.4 (23.2) | 42.2 (27.7) | -23.7 (-29.9, -17.5) <0.001 |

---

Data are mean (standard deviation), unless otherwise specified

CI=confidence interval

\*from separate regression models for each outcome fitted using Generalised Estimating Equations to allow for multiple births
